# Supplementary material
Source: PubMed Central journal article supplement (PMC4177332)
Supplement: NIHMS625876-supplement-1.pdf [file NIHMS625876-supplement-1.pdf]

## **Supplemental Information Inventory**

Figure S1, Related to Figure 1: **Embryonal carcinomas derived from iPS or ES p53<sup>-/-</sup> cells respond Omomyc<sup>ER</sup> activation while differentiated tissues can tolerate MYC blockade.**

Figure S2, Related to Figure 2 **Pathological characterization of iPS-derived brain tumors.**

Figure S3, Related to Figure 4. **Additional analyses of metabolic changes in PNETs.**
